# Supplementary material for: Semimechanistic Population Pharmacokinetic Model to Predict the Drug–Drug Interaction Between S‐ketamine and Ticlopidine in Healthy Human Volunteers
Source: PubMed Central journal article supplement — CPT Pharmacometrics Syst Pharmacol. 2018 Sep 10;7(10):687–97. doi: 10.1002/psp4.12346 (PMC6202471; doi:10.1002/psp4.12346), 2018-09-10

**Figure S2. Goodness-of-fit plots.**

Observations vs. individual and population predictions; conditionally weighted residuals (CWRES) vs. time after S-ketamine dose (TAD) and population predictions of S-ketamine and norketamine after orally administered 0.2-0.3 mg/kg S-ketamine during placebo (n = 67) and after oral ticlopidine pre-dosing (250 mg/day b.i.d for six days ,n = 11). The lower panel describes the goodness-of-fit plots for ticlopidine after ticlopidine predosing.

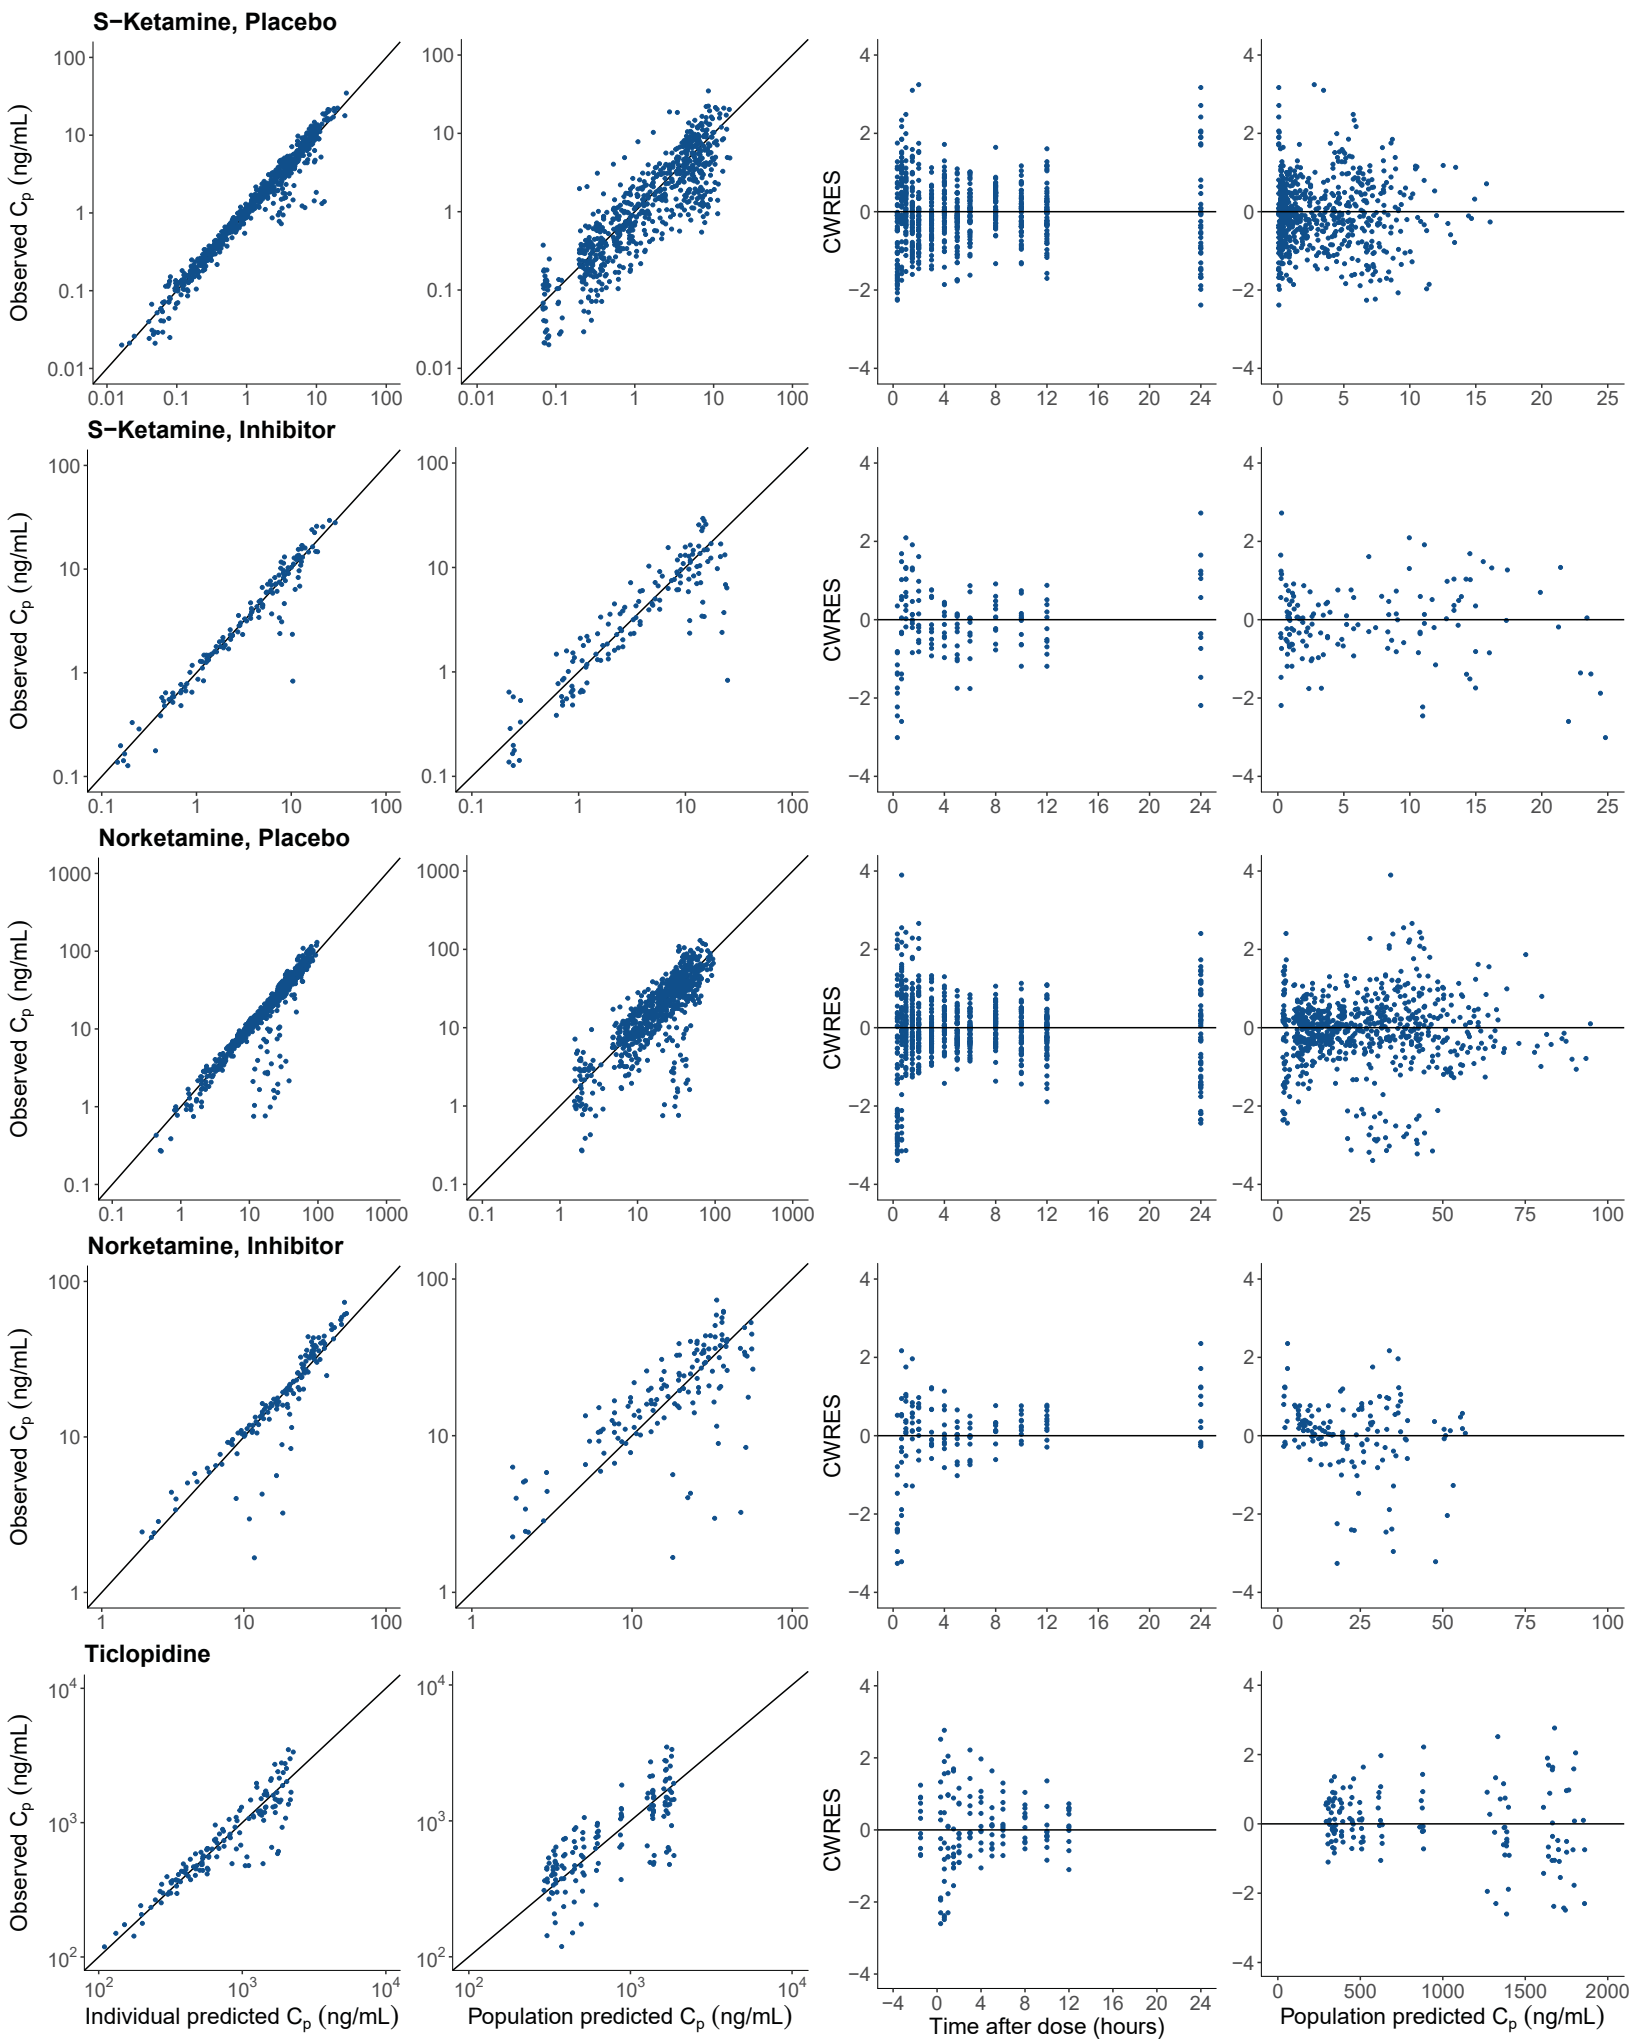

Supplement: PSP4-7-687-s004.pdf [file PSP4-7-687-s004.pdf]
